# Supplementary material
Source: publisher figshare collection journal article supplement (https://acs.figshare.com/ndownloader/files/3746122)
Supplement: Supplementary file 1 [file 3746122]

## **Supporting Information**

### **Proteome alterations of hippocampal cells caused by *Clostridium botulinum***

#### **C3 exoenzyme**

Anke Schröder, Astrid Rohrbeck, Ingo Just, Andreas Pich

Hannover Medical School, Institute of Toxicology, Hannover, Germany

#### **TABLE OF CONTENTS**

Suppl. Figure S1. Western blot analysis of RhoA demonstrating the ADP-ribosylation

Suppl. Figure S2. Mass shift of RhoA after ADP-ribosylation

Suppl. Figure S3. Verification of protein ratios by multiple reaction monitoring

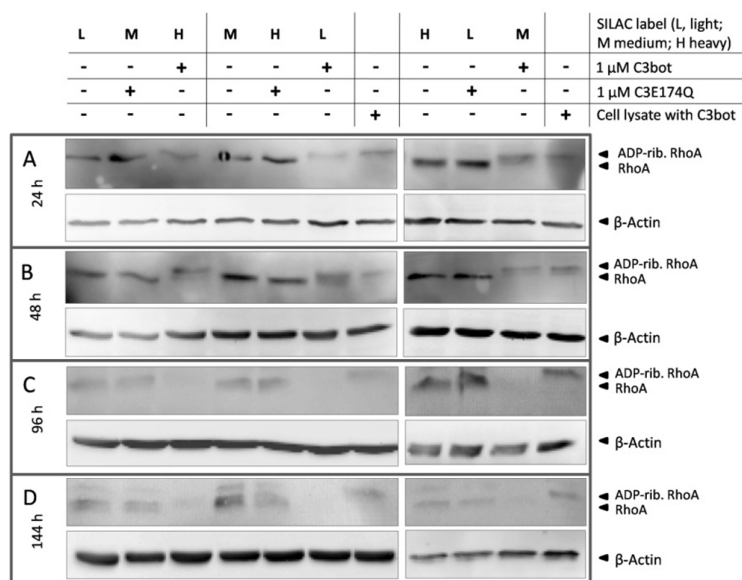

**Figure S1.** Western blot analysis of RhoA

Cells were exposed to 1000nM C3bot or C3E174Q for 24-144 h. Cell lysates were submitted to western blot analysis for RhoA including  $\beta$ -actin for protein load. In cell lysates which originated from C3bot treatment exhibit a shift of RhoA after 24-48 h to a higher molecular mass in SDS-PAGE which indicates ADP-ribosylation of GTPase. Lack of RhoA after 96-144 h C3bot treatment indicates a degradation or downregulation of RhoA.

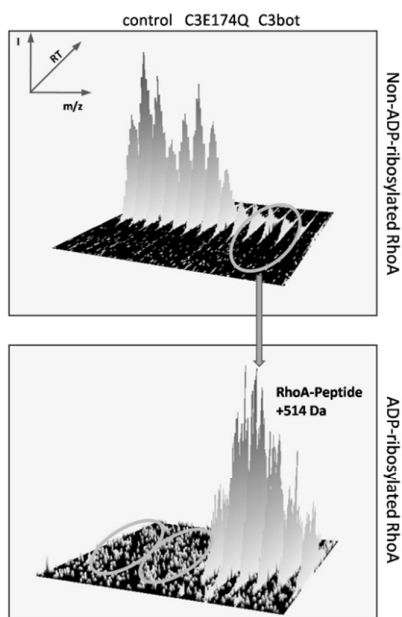

**Figure S2.** Mass shift of ADP-ribosylated RhoA

ADP-ribosylated Rho proteins exhibit a mass shift of 514 Da. The tryptic peptide of RhoA which contains the Asparagine-41 could be identified in the modified and unmodified state. The upper panel shows a SILAC triplet of the unmodified RhoA peptide. The heavy state which was treated with C3bot is decreased in intensity compared to the light (control) and medium (C3E174Q) state. Compatible to this finding shows the lower image only the heavy state of the SILAC triplet due to the absent modified light and heavy state peptides.

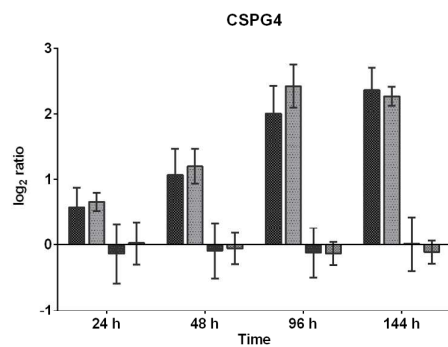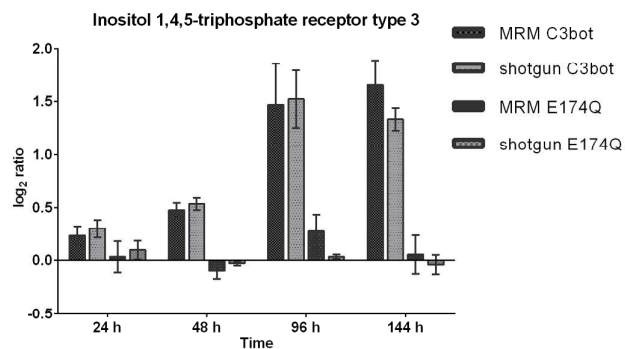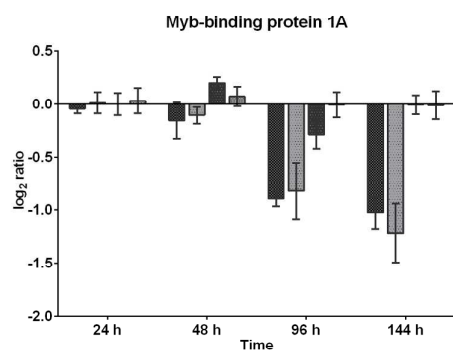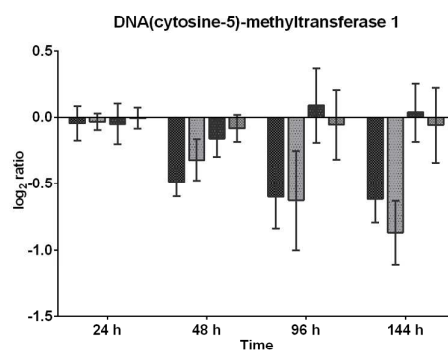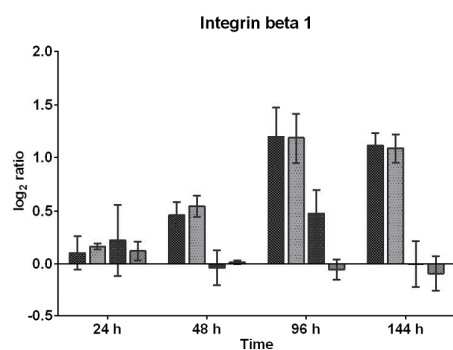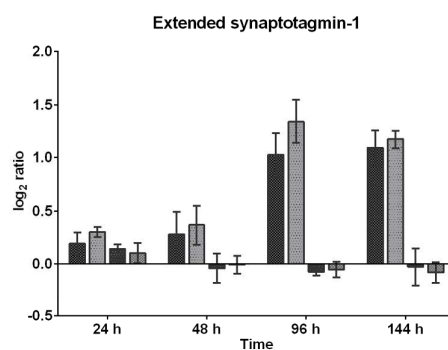

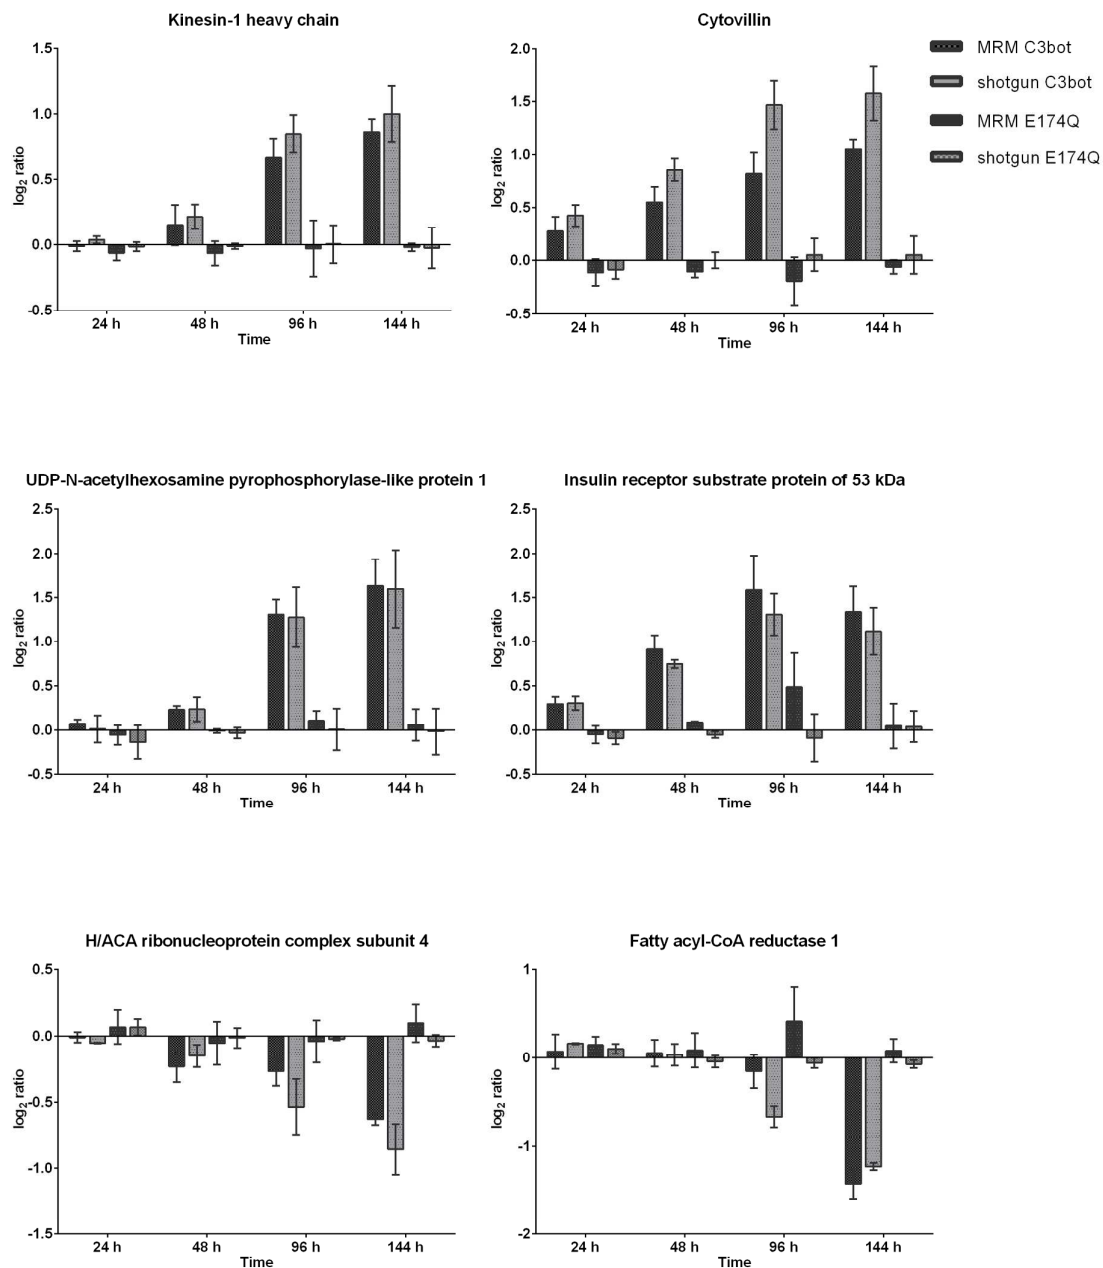

**Figure S3.** Verified protein ratios of regulated proteins

Protein ratios of 12 regulated proteins were logarithmized and compared to ratios obtained by MRM analysis. Overall protein ratios of both techniques correlate with each other for C3bot and C3E174Q treatment.
